# Supplementary material for: Healthcare Workers’ Moral Distress during the COVID-19 Pandemic: A Scoping Review
Source: MDPI journal article supplement (doi:10.3390/socsci12070371), 2023-06-26
Supplement: s1 [file s1]

Archive with 1 entries (1 files):
- socsci-2409567-supplementary.pdf
